# Supplementary material for: Three-Dimensional-Printed Vortex Tube Reactor for Continuous Flow Synthesis of Polyglycolic Acid Nanoparticles with High Productivity
Source: MDPI journal article supplement (doi:10.3390/nano13192679), 2023-09-29

# Three-Dimensional-Printed Vortex Tube Reactor for Continuous Flow Synthesis of Polyglycolic Acid Nanoparticles with High Productivity

Kittipat Suwanpitak <sup>1</sup>, Pornsak Sriamornsak <sup>2,3,4</sup>, Inderbir Singh <sup>5</sup>, Tanikan Sangnim <sup>1,\*</sup> and Kampanart Huanbutta <sup>6,\*</sup>

<sup>1</sup> Faculty of Pharmaceutical Sciences, Burapha University, Chonburi 20131, Thailand; kittipatsuwanpitak@gmail.com

<sup>2</sup> Department of Industrial Pharmacy, Faculty of Pharmacy, Silpakorn University, Nakhon Pathom 73000, Thailand; sriamornsak\_p@su.ac.th

<sup>3</sup> Academy of Science, The Royal Society of Thailand, Bangkok 10300, Thailand

<sup>4</sup> Faculty of Pharmaceutical Sciences, Chulalongkorn University, Bangkok 10330, Thailand

<sup>5</sup> Chitkara College of Pharmacy, Chitkara University, Patiala 140401, Punjab, India; inderbir.singh@chitkara.edu.in

<sup>6</sup> Department of Manufacturing Pharmacy, College of Pharmacy, Rangsit University, Pathum Thani 12000, Thailand

\* Correspondence: tanikan@go.buu.ac.th (T.S.); kampanart.h@rsu.ac.th (K.H.)

This file supplementary Table S1-3.

**Table S1.** Properties of water and ethanol for CFD calculation from the engineering database (Solid-works).

| Properties of water   |                   |                    |                      |
|-----------------------|-------------------|--------------------|----------------------|
| Density               | Dynamic viscosity | Specific heat (Cp) | Thermal conductivity |
|                       |                   |                    |                      |
| Properties of ethanol |                   |                    |                      |
| Density               | Dynamic viscosity | Specific heat (Cp) | Thermal conductivity |
|                       |                   |                    |                      |

**Table S2.** Difference mesh refinement of the automating generated mesh in seven levels.

| Mesh refinement                                                                     |                                                                                     |                                                                                      |                                                                                      |
|-------------------------------------------------------------------------------------|-------------------------------------------------------------------------------------|--------------------------------------------------------------------------------------|--------------------------------------------------------------------------------------|
| Level 1                                                                             | Level 2                                                                             | Level 3                                                                              | Level 4                                                                              |
| 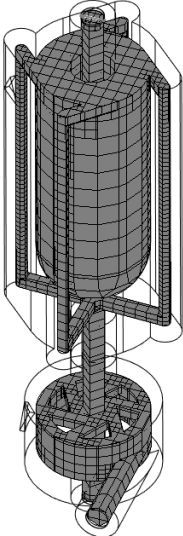  |   |   |  |
| Level 5                                                                             | Level 6                                                                             | Level 7                                                                              |                                                                                      |
|  |  |  |                                                                                      |

Table S3. Mesh independency test using the vortex tube reactor model.

| Mode l | Mesh level | Mesh cell count | Iteration | Mass fraction of water | Reynold number | Convergence plot of mesh independency test using the vortex tube reactor model |
|--------|------------|-----------------|-----------|------------------------|----------------|--------------------------------------------------------------------------------|
| 1      | 1          | 3,268           | 160       | 0.5495                 | 1,117.56       | <p>Mass fraction of water</p> <p>Mesh level</p> <p>MF of water</p> <p>Re</p>   |
|        | 2          | 3,558           | 160       | 0.5488                 | 1,192.62       |                                                                                |
|        | 3          | 24,010          | 268       | 0.5566                 | 1,115.46       |                                                                                |
|        | 4          | 48,429          | 300       | 0.5582                 | 1,092.6        |                                                                                |
|        | 5          | 122,228         | 351       | 0.5585                 | 1,081.32       |                                                                                |
|        | 6          | 817,569         | 521       | 0.5582                 | 1,070.28       |                                                                                |
|        | 7          | 2,236,753       | 695       | 0.5585                 | 1,069.44       |                                                                                |
| 2      | 1          | 3,117           | 127       | 0.5542                 | 1,751.05       | <p>Mass fraction of water</p> <p>Mesh level</p> <p>MF of water</p> <p>Re</p>   |
|        | 2          | 2,677           | 141       | 0.5541                 | 1,793.60       |                                                                                |
|        | 3          | 17,398          | 216       | 0.5572                 | 1,742.80       |                                                                                |
|        | 4          | 44,850          | 261       | 0.5571                 | 1,701.90       |                                                                                |
|        | 5          | 112,741         | 320       | 0.558                  | 1,689.10       |                                                                                |
|        | 6          | 821,352         | 508       | 0.5577                 | 1,677.65       |                                                                                |
|        | 7          | 2,276,391       | 676       | 0.5577                 | 1,676.95       |                                                                                |
| 3      | 1          | 3,163           | 160       | 0.5537                 | 1,213.29       | <p>Mass fraction of water</p> <p>Mesh level</p> <p>MF of water</p> <p>Re</p>   |
|        | 2          | 3,320           | 160       | 0.5547                 | 1,274.74       |                                                                                |
|        | 3          | 15,409          | 239       | 0.5566                 | 1,195.06       |                                                                                |
|        | 4          | 30,693          | 246       | 0.5574                 | 1,171.68       |                                                                                |
|        | 5          | 76,805          | 283       | 0.5577                 | 1,160.21       |                                                                                |
|        | 6          | 658,343         | 447       | 0.5578                 | 1,148.58       |                                                                                |
|        | 7          | 1,828,178       | 620       | 0.5577                 | 1,147.72       |                                                                                |
| 4      | 1          | 3,117           | 126       | 0.5539                 | 1,750.41       | <p>Mass fraction of water</p> <p>Mesh level</p> <p>MF of water</p> <p>Re</p>   |
|        | 2          | 2,677           | 146       | 0.5548                 | 1,795.03       |                                                                                |
|        | 3          | 17,377          | 217       | 0.5573                 | 1,742.72       |                                                                                |
|        | 4          | 44,878          | 262       | 0.5571                 | 1,701.94       |                                                                                |
|        | 5          | 112,391         | 319       | 0.558                  | 1,689.10       |                                                                                |
|        | 6          | 821,325         | 508       | 0.5577                 | 1,677.65       |                                                                                |
|        | 7          | 2,276,856       | 676       | 0.5577                 | 1,676.95       |                                                                                |
| 5      | 1          | 2,335           | 160       | 0.5559                 | 1,222.86       | <p>Mass fraction of water</p> <p>Mesh level</p> <p>MF of water</p> <p>Re</p>   |
|        | 2          | 2,435           | 148       | 0.5545                 | 1,270.80       |                                                                                |
|        | 3          | 14,856          | 195       | 0.5576                 | 1,194.00       |                                                                                |
|        | 4          | 34,843          | 222       | 0.5578                 | 1,169.70       |                                                                                |
|        | 5          | 90,903          | 261       | 0.5576                 | 1,156.02       |                                                                                |
|        | 6          | 133,316         | 437       | 0.5577                 | 1,148.88       |                                                                                |
|        | 7          | 1,997,191       | 598       | 0.5574                 | 1,148.04       |                                                                                |

| Mode l | Mesh level | Mesh cell count | Iteration | Mass fraction of water | Reynold number | Convergence plot of mesh independency test using the vortex tube reactor model                                                                                                                                                                                                 |
|--------|------------|-----------------|-----------|------------------------|----------------|--------------------------------------------------------------------------------------------------------------------------------------------------------------------------------------------------------------------------------------------------------------------------------|
| 6      | 1          | 1,409           | 58        | 0.4574                 | 755.68         | <p>Convergence plot for Mode 6 showing Mass fraction of water (MF of water) and Reynolds number (Re) vs Mesh level. The plot shows that as the mesh level increases, the mass fraction of water increases and the Reynolds number also increases, indicating convergence.</p>  |
|        | 2          | 2,418           | 116       | 0.5543                 | 804.36         |                                                                                                                                                                                                                                                                                |
|        | 3          | 11,806          | 184       | 0.5571                 | 785.24         |                                                                                                                                                                                                                                                                                |
|        | 4          | 32,957          | 201       | 0.558                  | 775.96         |                                                                                                                                                                                                                                                                                |
|        | 5          | 85,334          | 226       | 0.558                  | 770.76         |                                                                                                                                                                                                                                                                                |
|        | 6          | 849,119         | 383       | 0.5568                 | 767.20         |                                                                                                                                                                                                                                                                                |
|        | 7          | 603,021         | 363       | 0.556                  | 767.72         |                                                                                                                                                                                                                                                                                |
| 7      | 1          | 5,039           | 145       | 0.5548                 | 1,974.36       | <p>Convergence plot for Mode 7 showing Mass fraction of water (MF of water) and Reynolds number (Re) vs Mesh level. The plot shows that as the mesh level increases, the mass fraction of water increases and the Reynolds number also increases, indicating convergence.</p>  |
|        | 2          | 3,664           | 144       | 0.5516                 | 2,035.48       |                                                                                                                                                                                                                                                                                |
|        | 3          | 16,898          | 228       | 0.5574                 | 1,965.32       |                                                                                                                                                                                                                                                                                |
|        | 4          | 36,375          | 260       | 0.5577                 | 1,952.00       |                                                                                                                                                                                                                                                                                |
|        | 5          | 102,972         | 310       | 0.5581                 | 1,931.88       |                                                                                                                                                                                                                                                                                |
|        | 6          | 1,031,558       | 488       | 0.5578                 | 1,924.36       |                                                                                                                                                                                                                                                                                |
|        | 7          | 2,843,638       | 651       | 0.557                  | 1,923.72       |                                                                                                                                                                                                                                                                                |
| 8      | 1          | 5,498           | 167       | 0.5559                 | 792.80         | <p>Convergence plot for Mode 8 showing Mass fraction of water (MF of water) and Reynolds number (Re) vs Mesh level. The plot shows that as the mesh level increases, the mass fraction of water increases and the Reynolds number also increases, indicating convergence.</p>  |
|        | 2          | 3,687           | 160       | 0.5584                 | 815.44         |                                                                                                                                                                                                                                                                                |
|        | 3          | 23,934          | 276       | 0.5601                 | 785.36         |                                                                                                                                                                                                                                                                                |
|        | 4          | 53,093          | 292       | 0.5584                 | 779.52         |                                                                                                                                                                                                                                                                                |
|        | 5          | 156,980         | 301       | 0.5583                 | 770.20         |                                                                                                                                                                                                                                                                                |
|        | 6          | 1,428,243       | 526       | 0.5583                 | 765.72         |                                                                                                                                                                                                                                                                                |
|        | 7          | 3,882,523       | 696       | 0.5579                 | 765.20         |                                                                                                                                                                                                                                                                                |
| 9      | 1          | 1,425           | 134       | 0.5581                 | 834.60         | <p>Convergence plot for Mode 9 showing Mass fraction of water (MF of water) and Reynolds number (Re) vs Mesh level. The plot shows that as the mesh level increases, the mass fraction of water increases and the Reynolds number also increases, indicating convergence.</p>  |
|        | 2          | 2,591           | 123       | 0.5553                 | 807.08         |                                                                                                                                                                                                                                                                                |
|        | 3          | 15,666          | 200       | 0.5573                 | 785.24         |                                                                                                                                                                                                                                                                                |
|        | 4          | 45,878          | 220       | 0.5584                 | 775.44         |                                                                                                                                                                                                                                                                                |
|        | 5          | 120,732         | 248       | 0.558                  | 769.36         |                                                                                                                                                                                                                                                                                |
|        | 6          | 1,010,688       | 419       | 0.5569                 | 765.36         |                                                                                                                                                                                                                                                                                |
|        | 7          | 884,499         | 414       | 0.5559                 | 764.64         |                                                                                                                                                                                                                                                                                |
| 10     | 1          | 3,117           | 136       | 0.5558                 | 3,270.55       | <p>Convergence plot for Mode 10 showing Mass fraction of water (MF of water) and Reynolds number (Re) vs Mesh level. The plot shows that as the mesh level increases, the mass fraction of water increases and the Reynolds number also increases, indicating convergence.</p> |
|        | 2          | 2,677           | 160       | 0.5562                 | 3,345.20       |                                                                                                                                                                                                                                                                                |
|        | 3          | 17,377          | 244       | 0.558                  | 3,246.45       |                                                                                                                                                                                                                                                                                |
|        | 4          | 44,822          | 328       | 0.5581                 | 3,168.95       |                                                                                                                                                                                                                                                                                |
|        | 5          | 113,014         | 389       | 0.5584                 | 3,148.10       |                                                                                                                                                                                                                                                                                |
|        | 6          | 821,352         | 534       | 0.5586                 | 3,132.25       |                                                                                                                                                                                                                                                                                |

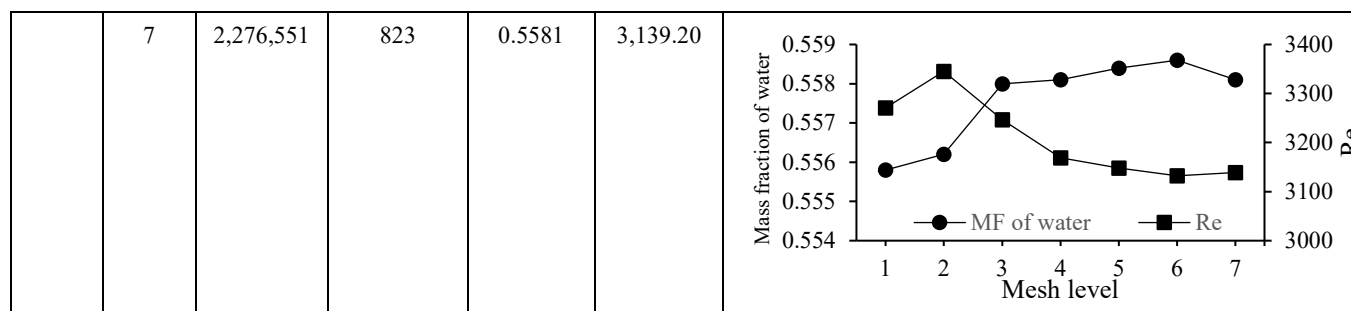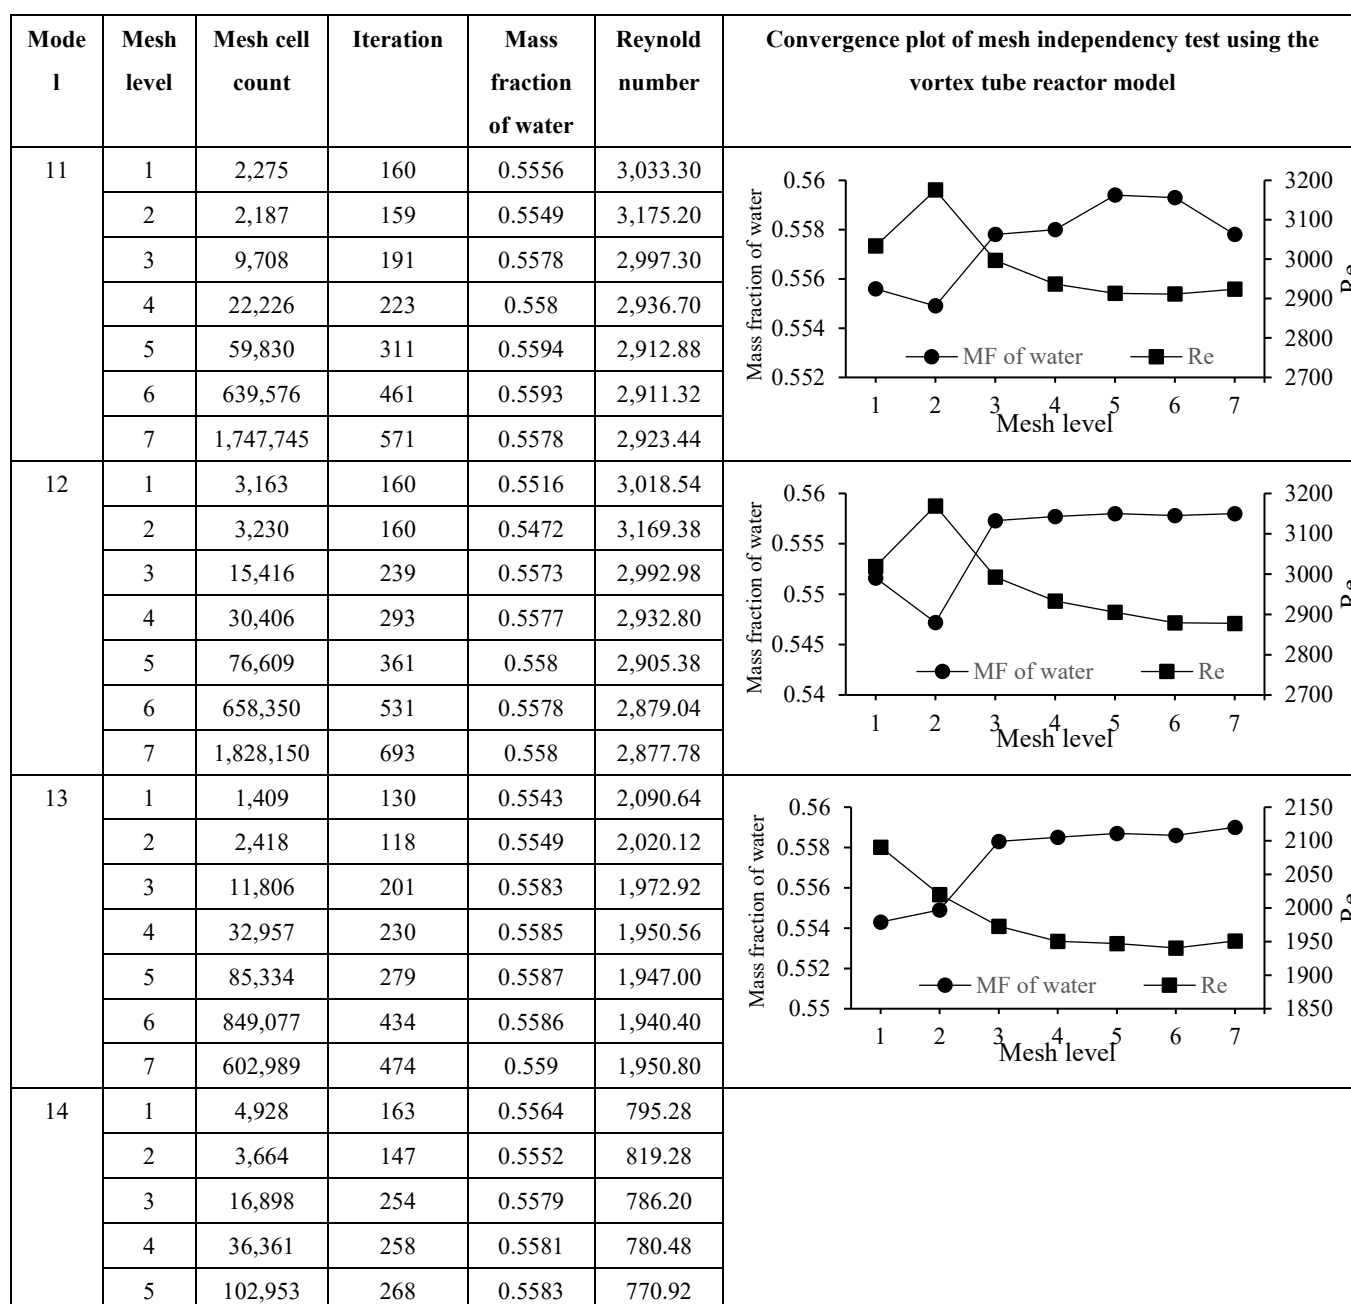

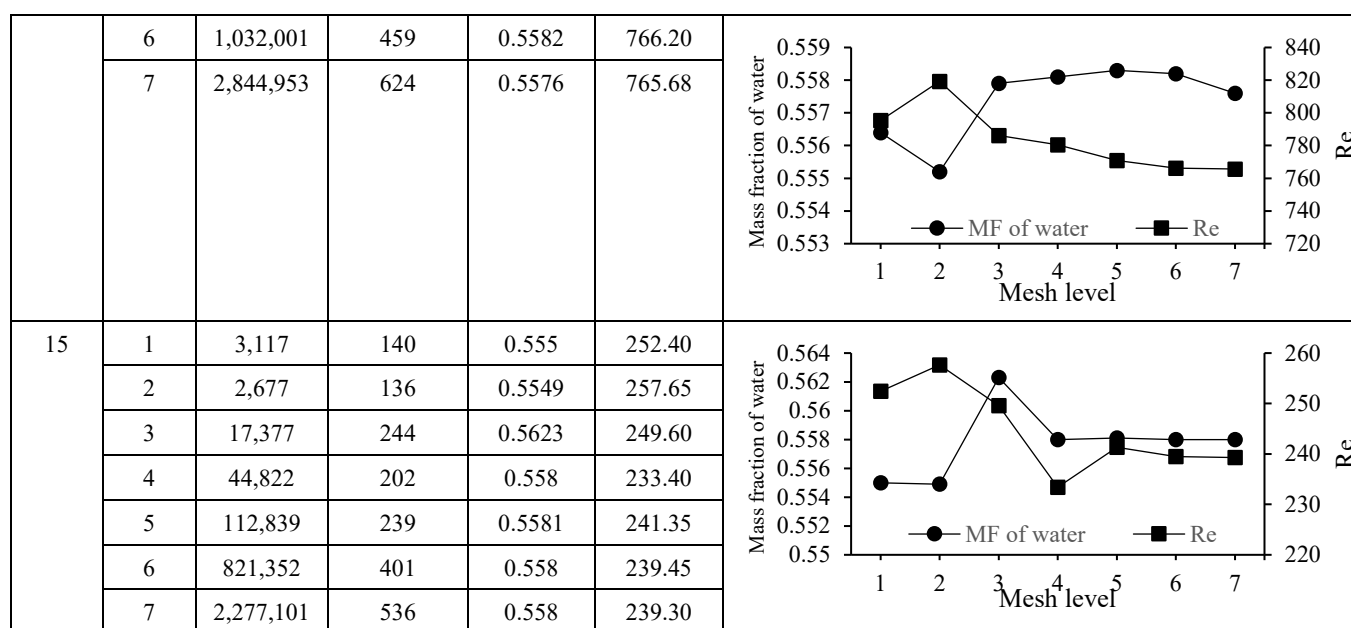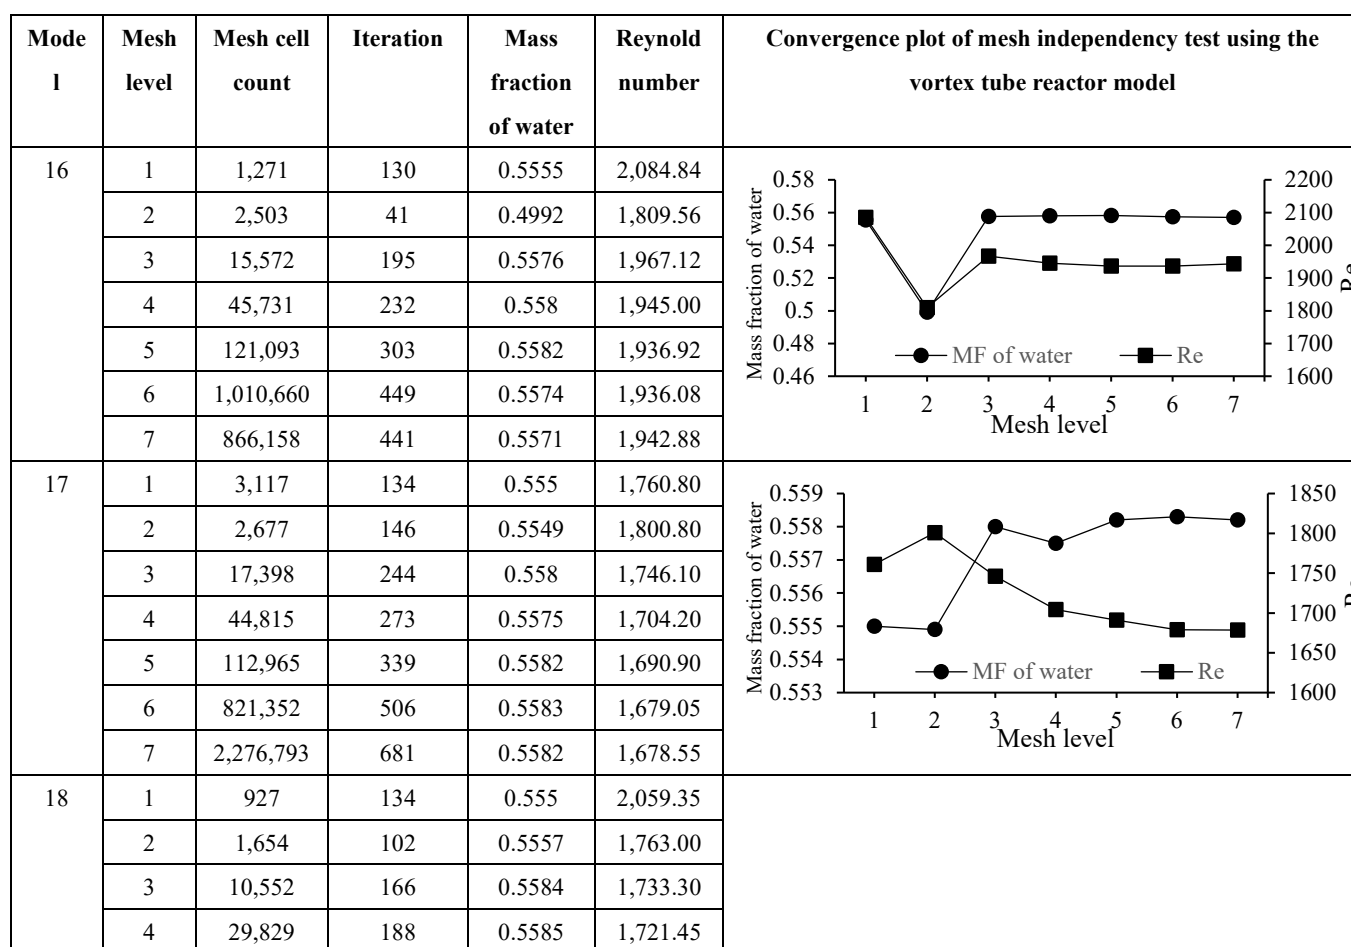

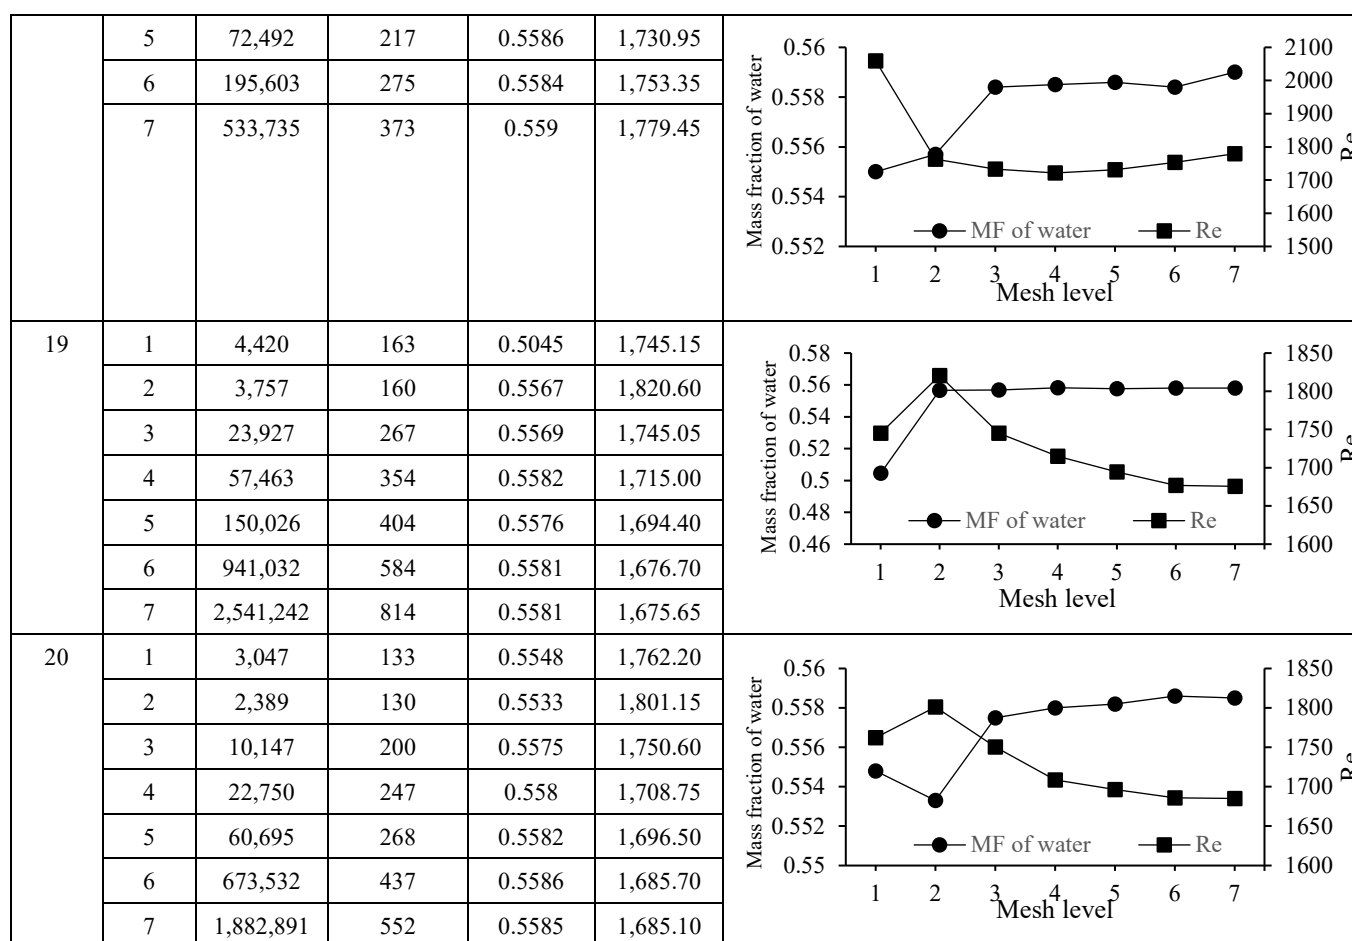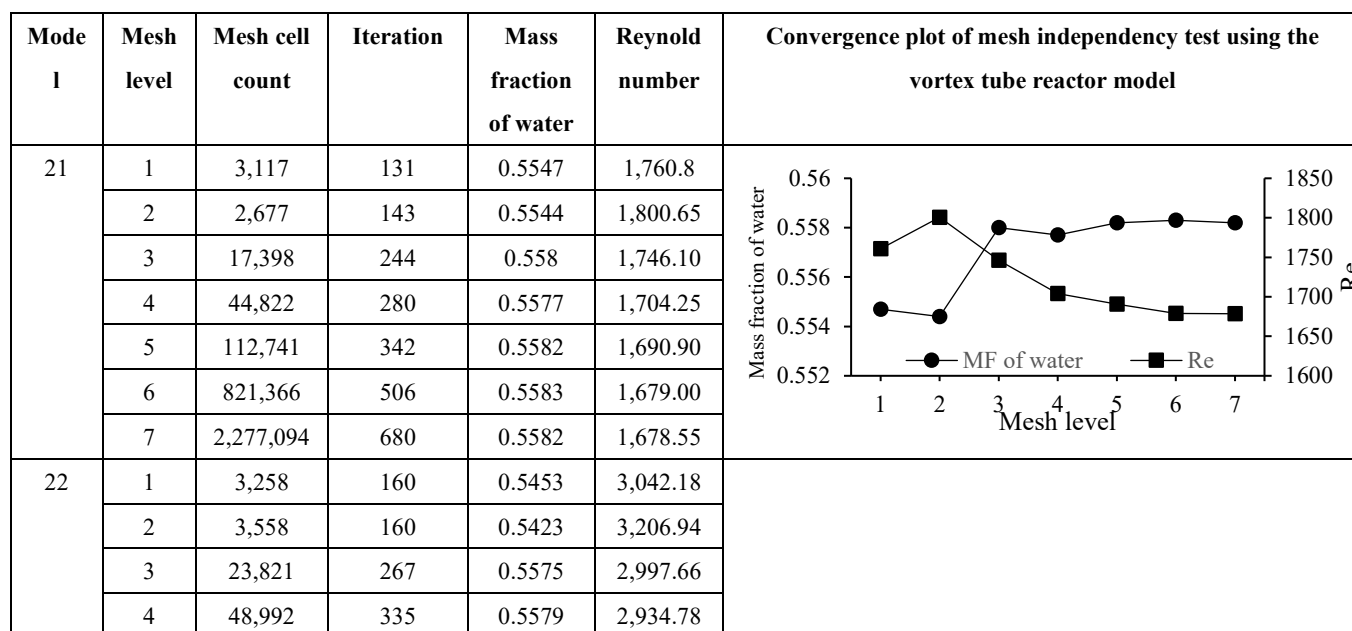

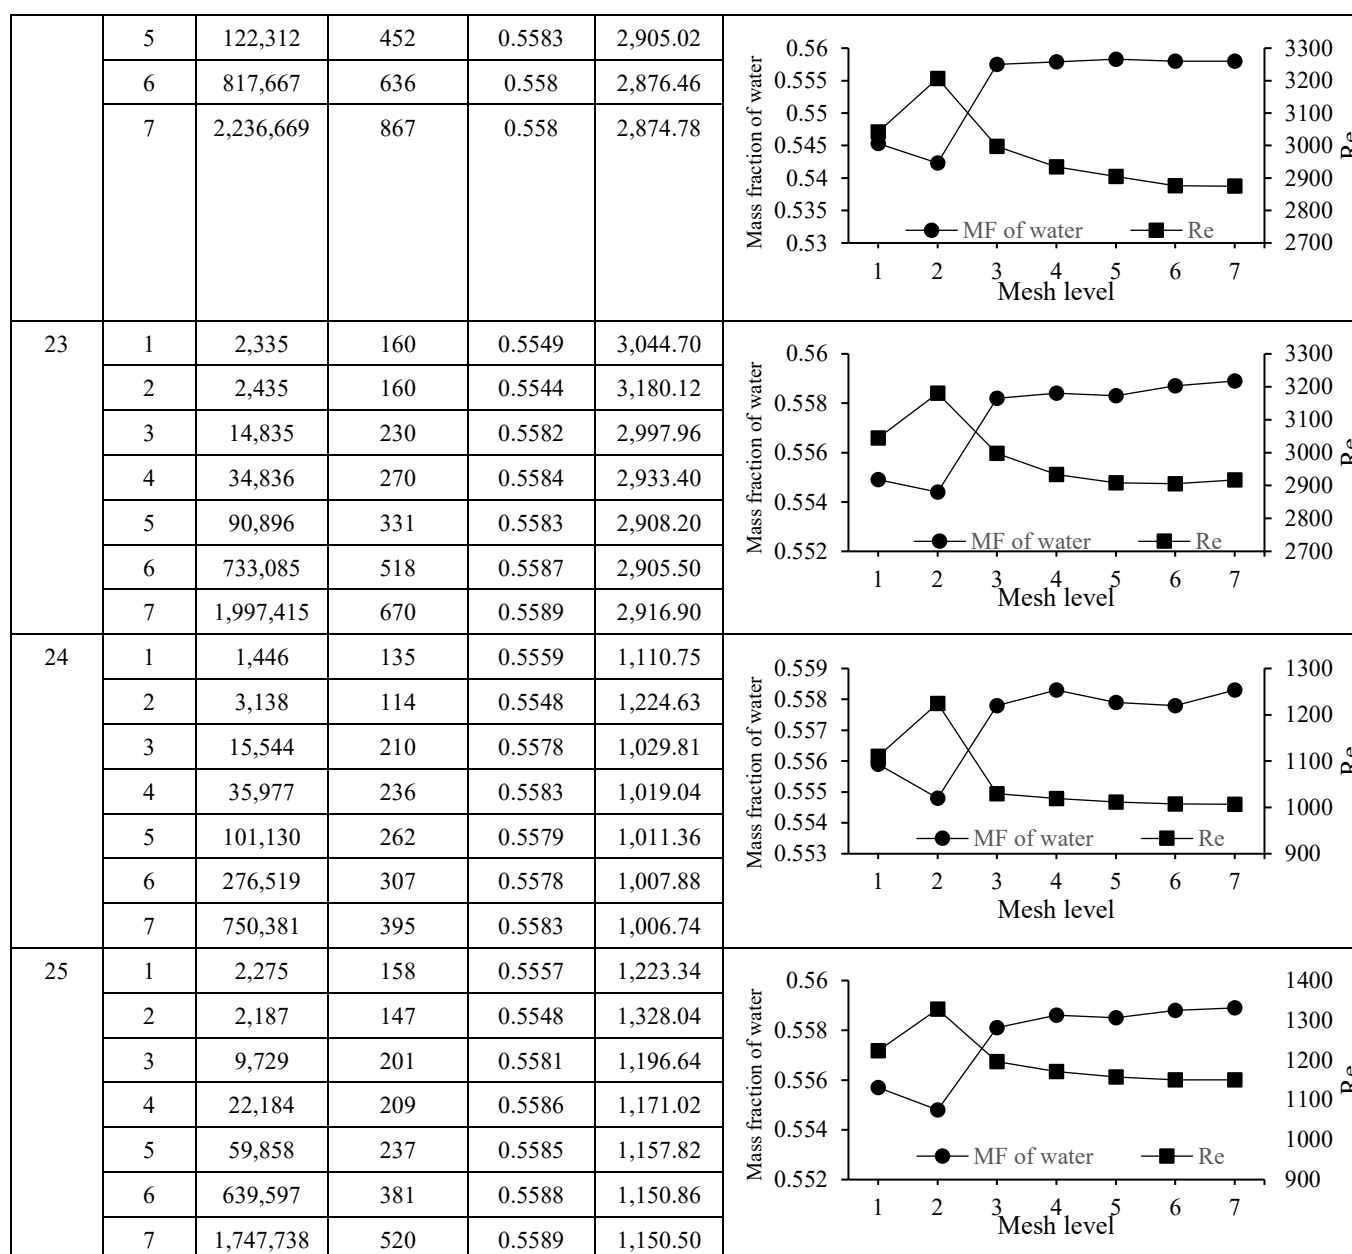

| Mode<br>l | Mesh<br>level | Mesh cell<br>count | Iteration | Mass<br>fraction<br>of water | Reynold<br>number | Convergence plot of mesh independency test using the<br>vortex tube reactor model |
|-----------|---------------|--------------------|-----------|------------------------------|-------------------|-----------------------------------------------------------------------------------|
| 26        | 1             | 5,387              | 164       | 0.5544                       | 1,984.04          |                                                                                   |
|           | 2             | 3,687              | 160       | 0.5527                       | 2,045.56          |                                                                                   |
|           | 3             | 23,934             | 276       | 0.5574                       | 1,965.12          |                                                                                   |
|           | 4             | 53,100             | 326       | 0.5583                       | 1,951.28          |                                                                                   |



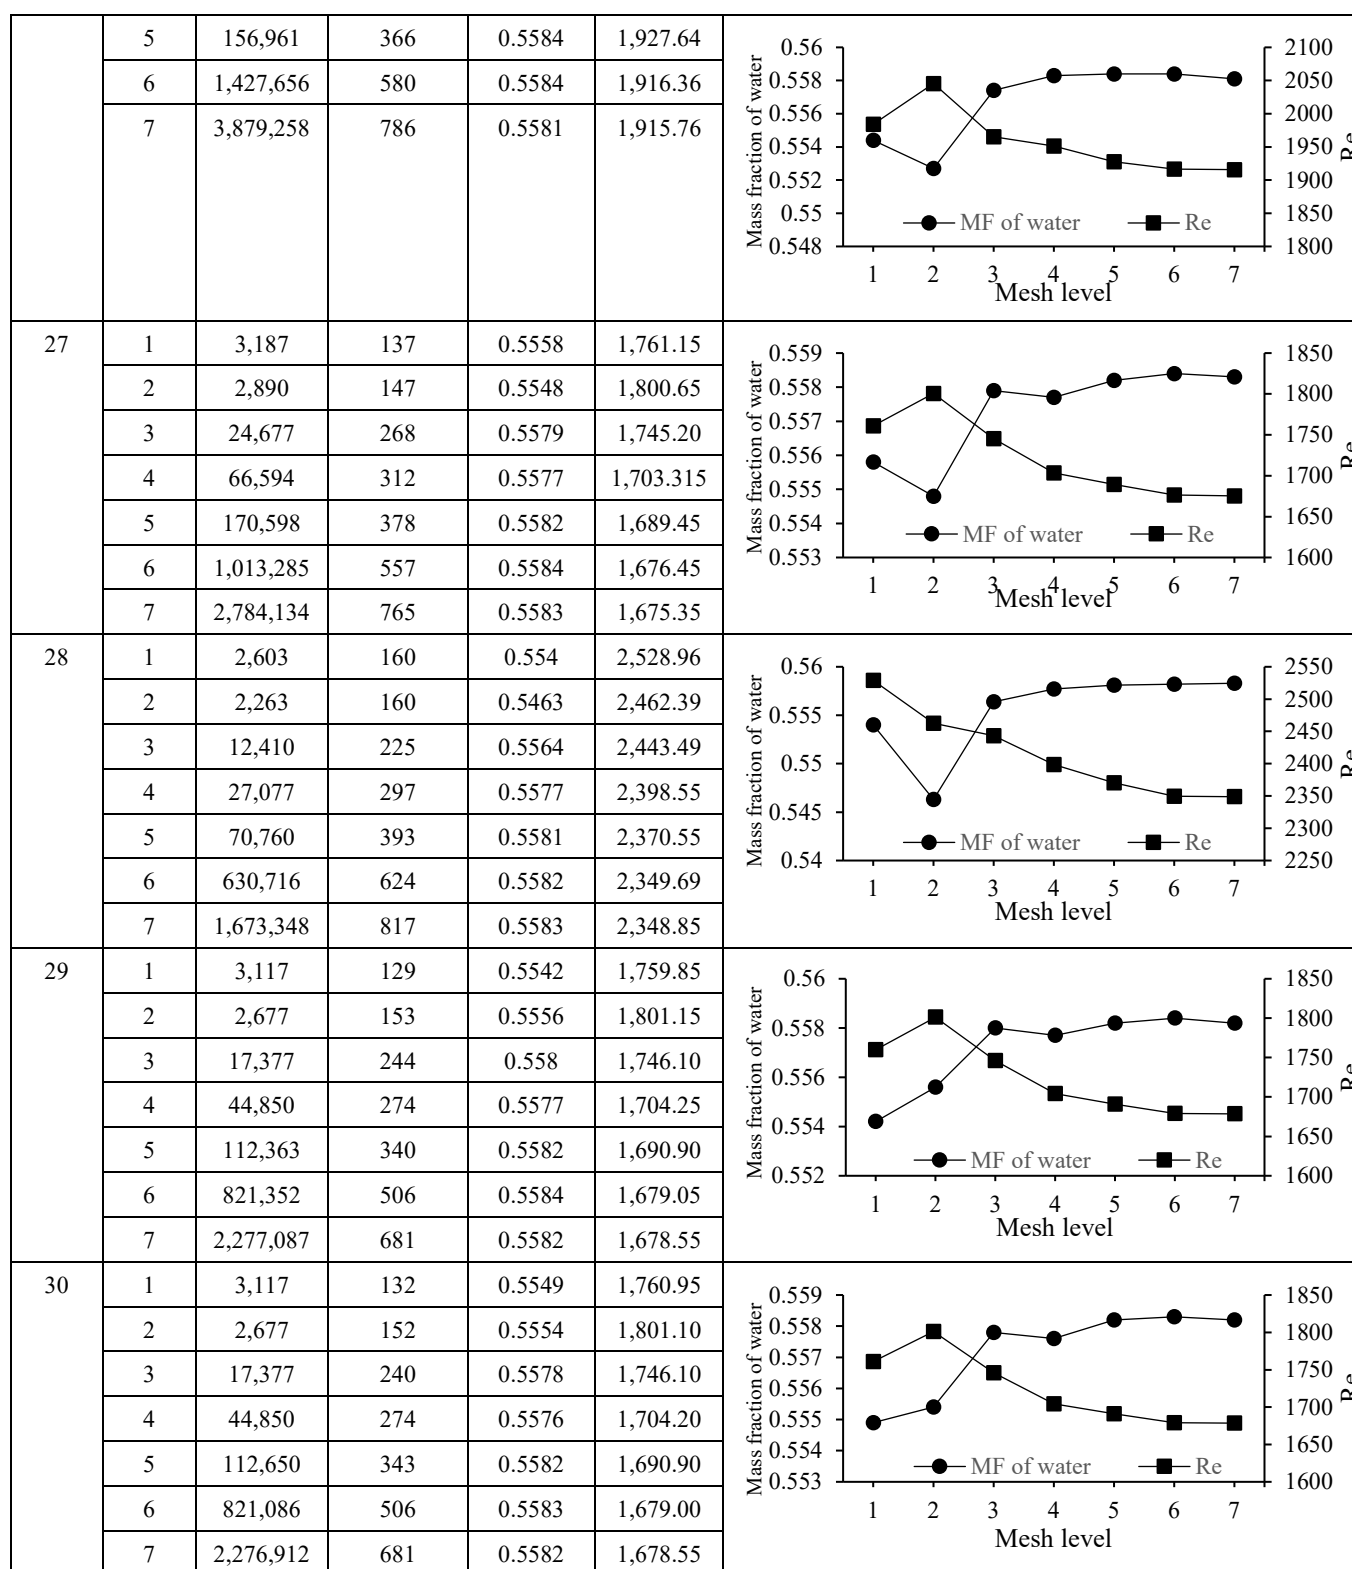

Supplement: s1 [file s1]
